# Supplementary material for: Hernia width explains differences in outcomes between primary and incisional hernias: a prospective cohort study of 9159 patients
Source: PubMed Central journal article supplement (PMC8055619; doi:10.1007/s10029-020-02340-1), 2020-11-23
Supplement: 10029_2020_2340_MOESM1_ESM.pdf [file 10029_2020_2340_MOESM1_ESM.pdf]

## Supplementary material

### Online Resource 1. Baseline patient characteristics

|                                              | <b>Primary hernia<br/>(n = 4965)</b> | <b>N missing<br/>(%)</b> | <b>Incisional hernia<br/>(n =4194)</b> | <b>N missing<br/>(%)</b> | <b>p-value</b>   |
|----------------------------------------------|--------------------------------------|--------------------------|----------------------------------------|--------------------------|------------------|
| <b>Age in years</b>                          | 57 (22)                              | 0                        | 67 (19)                                | 0                        | <b>&lt;0.001</b> |
| <b>Male sex</b>                              | 3017 (60.8)                          | 0                        | 1970 (47.0)                            | 0                        | <b>&lt;0.001</b> |
| <b>BMI, kg/m2</b>                            | 27.1 (7)                             | 47 (0.9)                 | 28.4 (7)                               | 48 (1.1)                 | <b>&lt;0.001</b> |
| <b>Smoking</b>                               | 1086 (22.3)                          | 98 (2.0)                 | 730 (18.2)                             | 178 (4.2)                | <b>&lt;0.001</b> |
| <b>Diabetes mellitus</b>                     | 349 (7.1)                            | 64 (1.3)                 | 567 (13.8)                             | 75 (1.8)                 | <b>&lt;0.001</b> |
| <b>Corticosteroid use</b>                    | 100 (2.0)                            | 64 (1.3)                 | 108 (2.6)                              | 75 (1.8)                 | 0.067            |
| <b>Pelvic radiotherapy</b>                   | 19 (0.4)                             | 64 (1.3)                 | 89 (2.2)                               | 75 (1.8)                 | <b>&lt;0.001</b> |
| <b>Chemo- or immunotherapy</b>               | 59 (1.2)                             | 64 (1.3)                 | 274 (6.7)                              | 75 (1.8)                 | <b>&lt;0.001</b> |
| <b>AAA</b>                                   | 2 (0.04)                             | 33 (0.7)                 | 22 (0.5)                               | 24 (0.6)                 | <b>&lt;0.001</b> |
| <b>Connective tissue disorder</b>            | 5 (0.1)                              | 33 (0.7)                 | 5 (0.1)                                | 24 (0.6)                 | 0.790            |
| <b>Anticoagulant use or<br/>coagulopathy</b> | 421 (8.6)                            | 64 (1.3)                 | 712 (17.3)                             | 75 (1.8)                 | <b>&lt;0.001</b> |
| <b>Ascites</b>                               | 32 (0.7)                             | 67 (1.3)                 | 19 (0.5)                               | 54 (1.3)                 | 0.219            |
| <b>History of abdominal wall hernia</b>      | 709 (14.4)                           | 33 (0.7)                 | 1708 (41.0)                            | 24 (0.6)                 | <b>&lt;0.001</b> |
| Inguinal hernia                              | 535 (10.8)                           | 33 (0.7)                 | 513 (12.3)                             | 24 (0.6)                 | <b>0.030</b>     |
| Primary ventral hernia                       | 153 (3.1)                            | 33 (0.7)                 | 705 (16.9)                             | 24 (0.6)                 | <b>&lt;0.001</b> |
| Incisional hernia                            | 34 (0.7)                             | 33 (0.7)                 | 696 (16.7)                             | 24 (0.6)                 | <b>&lt;0.001</b> |
| <b>Family history of hernia</b>              | 203 (4.1)                            | 33 (0.7)                 | 40 (1.0)                               | 24 (0.6)                 | <b>&lt;0.001</b> |
| <b>ASA class <math>\geq</math> 3</b>         | 676 (13.7)                           | 46 (0.9)                 | 1195 (28.7)                            | 29 (0.7)                 | <b>&lt;0.001</b> |

Data are mean (interquartile range) for continuous variables and n (%) for categorical variables.

BMI: body mass index; AAA: aneurysm of the abdominal aorta; ASA: American Society of Anesthesiologists.

Online Resource 2. Hernia and surgical characteristics

| Hernia characteristics                 | Primary hernia<br>(n = 4965) | N missing<br>(%) | Incisional hernia<br>(n = 4194) | N missing<br>(%) | p-value |
|----------------------------------------|------------------------------|------------------|---------------------------------|------------------|---------|
| <b>Hernia width, cm</b>                | 2.0 (1.0)                    | 997 (20.1)       | 5.0 (4.0)                       | 130 (3.1)        | <0.001  |
| <b>Hernia length, cm</b>               | 2.0 (1.0)                    | 1002 (20.2)      | 5.0 (6.0)                       | 184 (4.4)        | <0.001  |
| <b>Symptoms</b>                        |                              | 37 (0.7)         |                                 | 34 (0.8)         | <0.001  |
| Asymptomatic                           | 1051 (21.3)                  |                  | 610 (14.7)                      |                  |         |
| Symptomatic <sup>a</sup>               | 3877 (78.6)                  |                  | 3550 (85.3)                     |                  |         |
| <b>Surgical characteristics</b>        |                              |                  |                                 |                  |         |
| <b>Emergency surgery</b>               | 180 (3.7)                    | 113 (2.3)        | 170 (4.1)                       | 79 (1.9)         | 0.305   |
| <b>Duration of operation, min</b>      | 20.0 (15.0)                  | 340 (6.8)        | 48.0 (60.0)                     | 269 (6.4)        | <0.001  |
| <b>Laparoscopic surgery</b>            | 1629 (33.8)                  | 147 (3.0)        | 1191 (29.2)                     | 113 (2.7)        | <0.001  |
| <b>Primary suture</b>                  | 1374 (28.9)                  | 203 (4.1)        | 363 (8.9)                       | 108 (2.6)        | <0.001  |
| <b>Mesh placement</b>                  | 3388 (71.1)                  | 203 (4.1)        | 3723 (91.1)                     | 108 (2.6)        | <0.001  |
| Intraperitoneal                        | 2440 (72.0)                  |                  | 2408 (64.7)                     |                  |         |
| Sublay                                 | 907 (26.8)                   |                  | 1208 (32.4)                     |                  |         |
| Onlay                                  | 36 (1.1)                     |                  | 96 (2.6)                        |                  |         |
| <b>Alteimeier wound classification</b> |                              | 116 (2.3)        |                                 | 76 (1.8)         | <0.001  |
| Clean                                  | 4656 (96.0)                  |                  | 3833 (93.1)                     |                  |         |
| Clean contaminated                     | 163 (3.4)                    |                  | 198 (4.8)                       |                  |         |
| Contaminated                           | 24 (0.5)                     |                  | 60 (1.5)                        |                  |         |
| Dirty                                  | 6 (0.1)                      |                  | 27 (0.7)                        |                  |         |
| <b>Antibiotic treatment</b>            |                              | 113 (2.3)        |                                 | 90 (2.1)         | <0.001  |
| None                                   | 2233 (46.0)                  |                  | 699 (17.0)                      |                  |         |
| Prophylactic                           | 2567 (52.9)                  |                  | 3197 (77.9)                     |                  |         |
| Therapeutic                            | 52 (1.1)                     |                  | 208 (5.1)                       |                  |         |

Data are mean (interquartile range) for continuous variables and n (%) for categorical variables.

<sup>a</sup> Symptomatic includes discomfort, pain and/or incarceration.

**Online Resource 3. Postoperative outcomes**

|                                                 | <b>Primary hernia<br/>(n = 4965)</b> | <b>N missing<br/>(%)</b> | <b>Incisional hernia<br/>(n = 4194)</b> | <b>N missing<br/>(%)</b> | <b>p-value</b>   |
|-------------------------------------------------|--------------------------------------|--------------------------|-----------------------------------------|--------------------------|------------------|
| <b>Admission duration, days</b>                 | 0.0 (1.0)                            | 552 (10.5)               | 3.0 (5.0)                               | 578 (13.8)               | <b>&lt;0.001</b> |
| <b>Intra-operative complications</b>            | 25 (0.5)                             | 278 (5.6)                | 87 (2.2)                                | 210 (5.0)                | <b>&lt;0.001</b> |
| <b>Wound complication within<br/>30 days</b>    | 131 (2.9)                            | 524 (10.6)               | 297 (7.8)                               | 394 (9.4)                | <b>&lt;0.001</b> |
| <b>Surgical complication within<br/>30 days</b> | 32 (0.7)                             | 552 (11.1)               | 163 (4.3)                               | 415 (9.9)                | <b>&lt;0.001</b> |
| <b>Medical complication within<br/>30 days</b>  | 68 (1.5)                             | 504 (10.2)               | 230 (6.0)                               | 387 (9.2)                | <b>&lt;0.001</b> |
| <b>Re-intervention<sup>a</sup></b>              | 35 (0.8)                             | 594 (12.0)               | 99 (2.6)                                | 457 (10.9)               | <b>&lt;0.001</b> |

*Data are mean (interquartile range) for continuous variables and n (%) for categorical variables.*

<sup>a</sup> *Re-intervention includes both surgical and radiological re-interventions.*

Online Resource 4. Baseline characteristics per width category

|                                           | Primary hernia | N missing (%) | Incisional hernia | N missing (%) | p-value |
|-------------------------------------------|----------------|---------------|-------------------|---------------|---------|
| <b>Age (years)</b>                        |                |               |                   |               |         |
| 0-2 cm                                    | 58.0 (21)      | 0 (0.0)       | 59.0 (25)         | 0 (0.0)       | 0.425   |
| 3-4 cm                                    | 63.0 (21)      | 0 (0.0)       | 66.0 (20)         | 0 (0.0)       | <0.001  |
| 5-10 cm                                   | 62.5 (24)      | 0 (0.0)       | 67.0 (17)         | 0 (0.0)       | <0.001  |
| >10 cm                                    | 66.0 (24)      | 0 (0.0)       | 69.0 (18)         | 0 (0.0)       | 0.140   |
| Total                                     | 57.0 (22)      | 0 (0.0)       | 67.0 (19)         | 0 (0.0)       | <0.001  |
| <b>Sex (male)</b>                         |                |               |                   |               |         |
| 0-2 cm                                    | 2063 (63.1)    | 0 (0.0)       | 177 (40.0)        | 0 (0.0)       | <0.001  |
| 3-4 cm                                    | 358 (63.3)     | 0 (0.0)       | 730 (48.6)        | 0 (0.0)       | <0.001  |
| 5-10 cm                                   | 50 (43.1)      | 0 (0.0)       | 775 (46.0)        | 0 (0.0)       | 0.538   |
| >10 cm                                    | 10 (62.5)      | 0 (0.0)       | 229 (52.3)        | 0 (0.0)       | 0.421   |
| Total                                     | 3017 (60.8)    | 0 (0.0)       | 1970 (47.0)       | 0 (0.0)       | <0.001  |
| <b>BMI, kg/m<sup>2</sup></b>              |                |               |                   |               |         |
| 0-2 cm                                    | 27.36 (7)      | 28 (0.9)      | 25.84 (7)         | 4 (0.9)       | <0.001  |
| 3-4 cm                                    | 30.43 (8)      | 12 (2.1)      | 28.30 (7)         | 10 (0.7)      | <0.001  |
| 5-10 cm                                   | 29.38 (8)      | 1 (0.9)       | 29.12 (8)         | 23 (1.4)      | 0.615   |
| >10 cm                                    | 27.93 (5)      | 0 (0.0)       | 29.38 (8)         | 8 (1.8)       | 0.690   |
| Total                                     | 27.12 (7)      | 47 (0.9)      | 28.41 (7)         | 48 (1.1)      | <0.001  |
| <b>Smoking</b>                            |                |               |                   |               |         |
| 0-2 cm                                    | 699 (21.8)     | 66 (2.0)      | 117 (27.2)        | 12 (2.7)      | 0.012   |
| 3-4 cm                                    | 94 (17.0)      | 14 (2.5)      | 253 (17.5)        | 53 (3.5)      | 0.815   |
| 5-10 cm                                   | 18 (15.9)      | 3 (2.6)       | 253 (15.8)        | 79 (4.7)      | 0.965   |
| >10 cm                                    | 2 (12.5)       | 0 (0)         | 85 (20.2)         | 17 (3.9)      | 0.450   |
| Total                                     | 1086 (22.3)    | 98 (2.0)      | 730 (18.2)        | 178 (4.2)     | <0.001  |
| <b>Diabetes mellitus</b>                  |                |               |                   |               |         |
| 0-2 cm                                    | 222 (6.9)      | 43 (1.3)      | 27 (6.2)          | 6 (1.4)       | 0.593   |
| 3-4 cm                                    | 65 (11.8)      | 14 (2.5)      | 187 (12.6)        | 22 (1.5)      | 0.597   |
| 5-10 cm                                   | 16 (13.9)      | 1 (0.9)       | 263 (16.0)        | 37 (2.2)      | 0.558   |
| >10 cm                                    | 1 (6.3)        | 0 (0.0)       | 71 (16.5)         | 8 (1.8)       | 0.273   |
| Total                                     | 349 (7.1)      | 64 (1.3)      | 567 (13.8)        | 75 (1.8)      | <0.001  |
| <b>Use of corticosteroids</b>             |                |               |                   |               |         |
| 0-2 cm                                    | 57 (1.8)       | 43 (1.3)      | 12 (2.8)          | 6 (1.4)       | 0.155   |
| 3-4 cm                                    | 13 (2.4)       | 14 (2.5)      | 34 (2.3)          | 22 (1.5)      | 0.940   |
| 5-10 cm                                   | 0 (0.0)        | 1 (0.9)       | 48 (2.9)          | 37 (2.2)      | 0.063   |
| >10 cm                                    | 0 (0.0)        | 0 (0.0)       | 12 (2.8)          | 8 (1.8)       | 0.498   |
| Total                                     | 100 (2.0)      | 64 (1.3)      | 108 (2.6)         | 75 (1.8)      | 0.067   |
| <b>History of pelvic radiotherapy</b>     |                |               |                   |               |         |
| 0-2 cm                                    | 11 (0.3)       | 43 (1.3)      | 7 (1.6)           | 6 (1.4)       | <0.001  |
| 3-4 cm                                    | 3 (0.5)        | 14 (2.5)      | 24 (1.6)          | 22 (1.5)      | 0.059   |
| 5-10 cm                                   | 0 (0.0)        | 1 (0.9)       | 37 (2.2)          | 37 (2.2)      | 0.104   |
| >10 cm                                    | 0 (0.0)        | 0 (0.0)       | 8 (1.9)           | 8 (1.8)       | 0.582   |
| Total                                     | 19 (0.4)       | 64 (1.3)      | 89 (2.2)          | 75 (1.8)      | <0.001  |
| <b>History of chemo- or immunotherapy</b> |                |               |                   |               |         |
| 0-2 cm                                    | 42 (1.3)       | 43 (1.3)      | 15 (3.4)          | 6 (1.4)       | 0.001   |
| 3-4 cm                                    | 5 (0.9)        | 14 (2.5)      | 57 (3.9)          | 22 (1.5)      | 0.001   |

|                                         |            |          |             |          |                  |
|-----------------------------------------|------------|----------|-------------|----------|------------------|
| 5-10 cm                                 | 3 (2.6)    | 1 (0.9)  | 133 (8.1)   | 37 (2.2) | <b>0.034</b>     |
| >10 cm                                  | 0 (0.0)    | 0 (0.0)  | 53 (12.3)   | 8 (1.8)  | 0.135            |
| Total                                   | 59 (1.2)   | 64 (1.3) | 274 (6.7)   | 75 (1.8) | <b>&lt;0.001</b> |
| <b>Use of anticoagulants</b>            |            |          |             |          |                  |
| 0-2 cm                                  | 290 (9.0)  | 43 (1.3) | 42 (9.6)    | 6 (1.4)  | 0.659            |
| 3-4 cm                                  | 67 (12.1)  | 14 (2.5) | 274 (18.5)  | 22 (1.5) | <b>0.001</b>     |
| 5-10 cm                                 | 11 (9.6)   | 1 (0.9)  | 295 (17.9)  | 37 (2.2) | <b>0.022</b>     |
| >10 cm                                  | 3 (18.8)   | 0 (0.0)  | 84 (19.5)   | 8 (1.8)  | 0.938            |
| Total                                   | 421 (8.6)  | 64 (1.3) | 712 (17.3)  | 75 (1.8) | <b>&lt;0.001</b> |
| <b>History of ascites</b>               |            |          |             |          |                  |
| 0-2 cm                                  | 14 (0.4)   | 45 (1.4) | 0 (0.0)     | 1 (0.2)  | 0.166            |
| 3-4 cm                                  | 10 (1.8)   | 10 (1.8) | 7 (0.5)     | 16 (1.1) | <b>0.003</b>     |
| 5-10 cm                                 | 3 (2.6)    | 2 (1.7)  | 9 (0.5)     | 24 (1.4) | <b>0.008</b>     |
| >10 cm                                  | 0 (0.0)    | 0 (0.0)  | 3 (0.7)     | 8 (1.8)  | 0.737            |
| Total                                   | 32 (0.7)   | 67 (1.3) | 19 (0.5)    | 54 (1.3) | 0.219            |
| <b>History of abdominal wall hernia</b> |            |          |             |          |                  |
| <b>Inguinal hernia</b>                  |            |          |             |          |                  |
| 0-2 cm                                  | 346 (10.7) | 25 (0.8) | 92 (20.9)   | 1 (0.2)  | <b>&lt;0.001</b> |
| 2-4 cm                                  | 60 (10.7)  | 5 (0.9)  | 201 (13.5)  | 9 (0.6)  | 0.092            |
| 5-10 cm                                 | 12 (10.4)  | 1 (0.9)  | 157 (9.4)   | 10 (0.6) | 0.710            |
| >10 cm                                  | 2 (12.5)   | 0 (0)    | 53 (12.1)   | 1 (0.2)  | 0.964            |
| Total                                   | 535 (10.8) | 33 (0.7) | 513 (12.3)  | 24 (0.6) | <b>0.030</b>     |
| <b>Primary ventral hernia</b>           |            |          |             |          |                  |
| 0-2 cm                                  | 89 (2.7)   | 25 (0.8) | 88 (20.0)   | 1 (0.2)  | <b>&lt;0.001</b> |
| 2-4 cm                                  | 31 (5.5)   | 5 (0.9)  | 286 (19.2)  | 9 (0.6)  | <b>&lt;0.001</b> |
| 5-10 cm                                 | 6 (5.2)    | 1 (0.9)  | 247 (14.8)  | 10 (0.6) | <b>0.004</b>     |
| >10 cm                                  | 0 (0.0)    | 0 (0)    | 68 (15.6)   | 1 (0.2)  | 0.087            |
| Total                                   | 153 (3.1)  | 33 (0.7) | 705 (16.9)  | 24 (0.6) | <b>&lt;0.001</b> |
| <b>Incisional hernia</b>                |            |          |             |          |                  |
| 0-2 cm                                  | 24 (0.7)   | 25 (0.8) | 27 (6.1)    | 1 (0.2)  | <b>&lt;0.001</b> |
| 2-4 cm                                  | 5 (0.9)    | 5 (0.9)  | 202 (13.5)  | 9 (0.6)  | <b>&lt;0.001</b> |
| 5-10 cm                                 | 1 (0.9)    | 1 (0.9)  | 254 (21.2)  | 10 (0.6) | <b>&lt;0.001</b> |
| >10 cm                                  | 0 (0.0)    | 0 (0)    | 89 (20.4)   | 1 (0.2)  | <b>0.044</b>     |
| Total                                   | 34 (0.7)   | 33 (0.7) | 696 (16.7)  | 24 (0.6) | <b>&lt;0.001</b> |
| <b>Family history of hernia</b>         |            |          |             |          |                  |
| 0-2 cm                                  | 109 (3.4)  | 25 (0.8) | 7 (91.6)    | 1 (0.2)  | <b>0.046</b>     |
| 2-4 cm                                  | 13 (2.3)   | 5 (0.9)  | 20 (1.3)    | 9 (0.6)  | 0.117            |
| 5-10 cm                                 | 1 (0.9)    | 1 (0.9)  | 10 (0.6)    | 10 (0.6) | 0.718            |
| >10 cm                                  | 2 (12.5)   | 0 (0)    | 2 (0.5)     | 1 (0.2)  | <b>&lt;0.001</b> |
| Total                                   | 203 (4.1)  | 33 (0.7) | 40 (1.0)    | 24 (1.6) | <b>&lt;0.001</b> |
| <b>ASA class <math>\geq</math> 3</b>    |            |          |             |          |                  |
| 0-2 cm                                  | 419 (12.9) | 32 (1.0) | 85 (19.3)   | 2 (0.5)  | <b>&lt;0.001</b> |
| 3-4 cm                                  | 126 (22.5) | 5 (0.9)  | 386 (25.9)  | 9 (0.6)  | 0.111            |
| 5-10 cm                                 | 31 (27.0)  | 1 (0.9)  | 527 (31.6)  | 13 (0.8) | 0.303            |
| >10 cm                                  | 4 (25.0)   | 0 (0.0)  | 172 (39.4)  | 1 (0.2)  | 0.247            |
| Total                                   | 676 (13.7) | 46 (0.9) | 1195 (28.7) | 29 (0.7) | <b>&lt;0.001</b> |

Data are mean (interquartile range) for continuous variables and n (%) for categorical variables.  
 BMI: body mass index; ASA: American Society of Anesthesiologists.
